# Supplementary material
Source: PubMed Central journal article supplement (PMC7318979)
Supplement: mmc1.pdf [file mmc1.pdf]

**Appendix**  
**The Impact of Social Vulnerability on COVID-19 in the U.S.:**  
**An Analysis of Spatially Varying Relationships**  
**Karaye and Horney**

**Appendix Figure 1.** Coefficient map for the association between minority status and language and COVID-19 case counts in the U.S. (N=3,108).

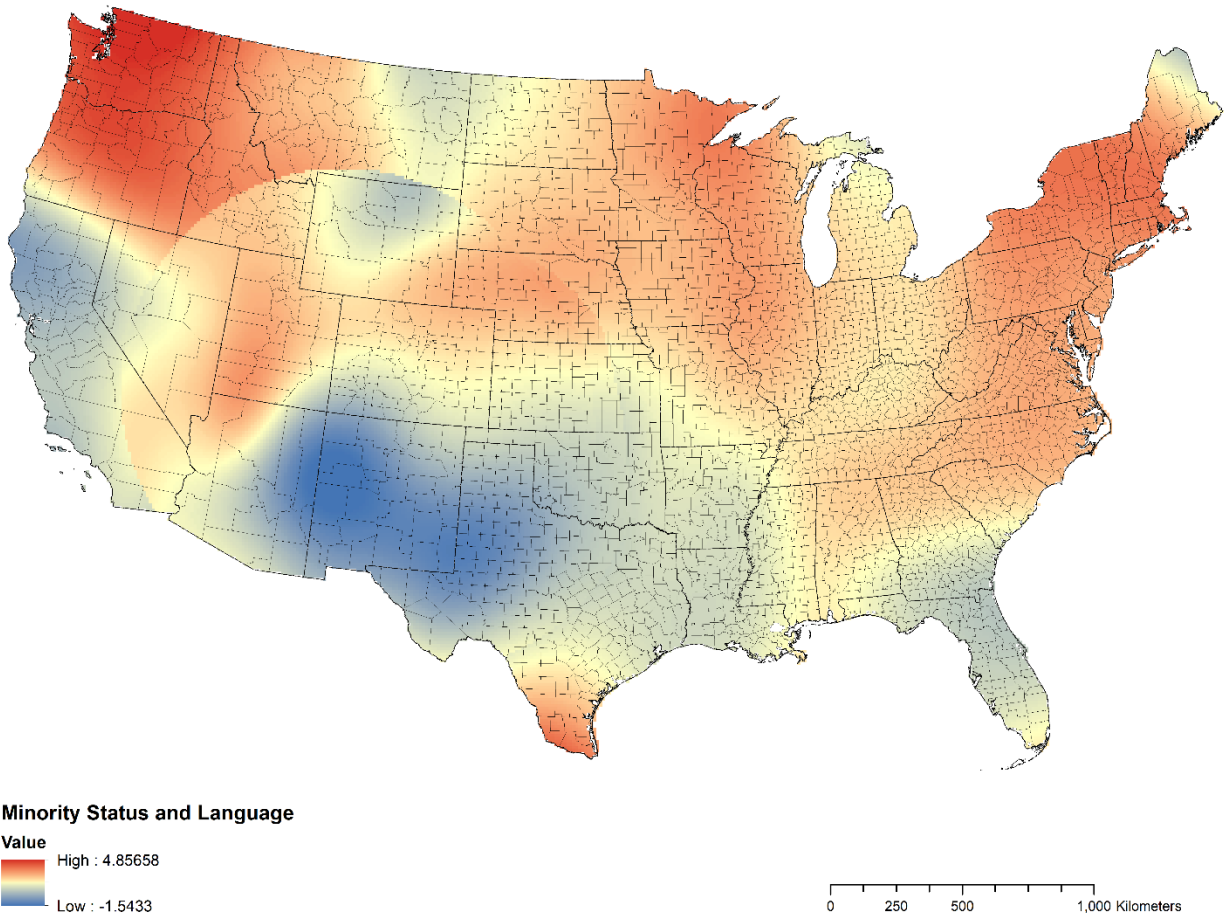

**Appendix**  
**The Impact of Social Vulnerability on COVID-19 in the U.S.:**  
**An Analysis of Spatially Varying Relationships**  
**Karaye and Horney**

**Appendix Figure 2.** Coefficient map for the association between housing and transportation and COVID-19 case counts in the U.S. (N=3,108).

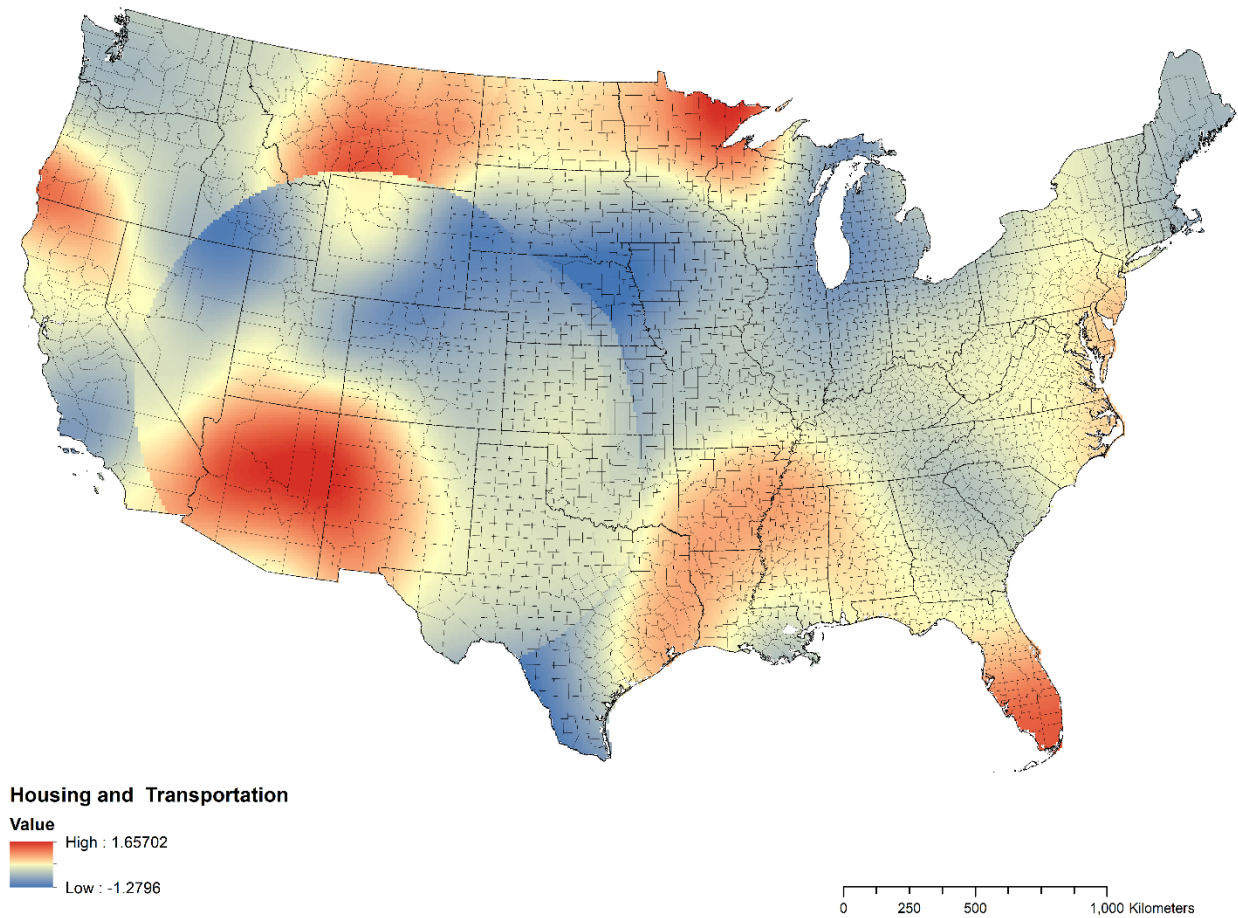

**Appendix**  
**The Impact of Social Vulnerability on COVID-19 in the U.S.:**  
**An Analysis of Spatially Varying Relationships**  
**Karaye and Horney**

**Appendix Figure 3.** Coefficient map for the association between household composition and disability and COVID-19 case counts in the U.S. (N=3,108).

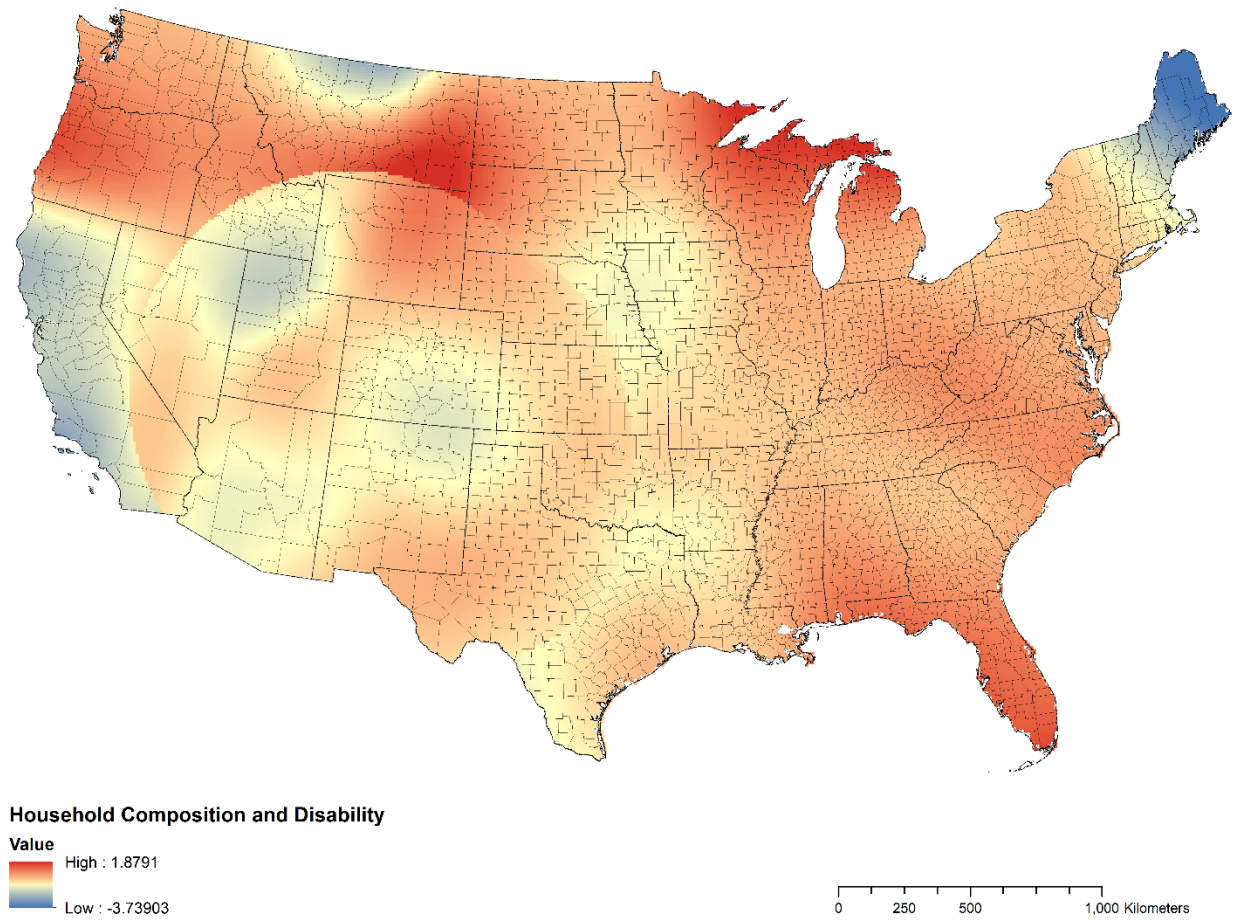

**Appendix**  
**The Impact of Social Vulnerability on COVID-19 in the U.S.:**  
**An Analysis of Spatially Varying Relationships**  
**Karaye and Horney**

**Appendix Figure 4.** Coefficient map for the association between overall SVI and COVID-19 case counts in the U.S. (N=2,844).

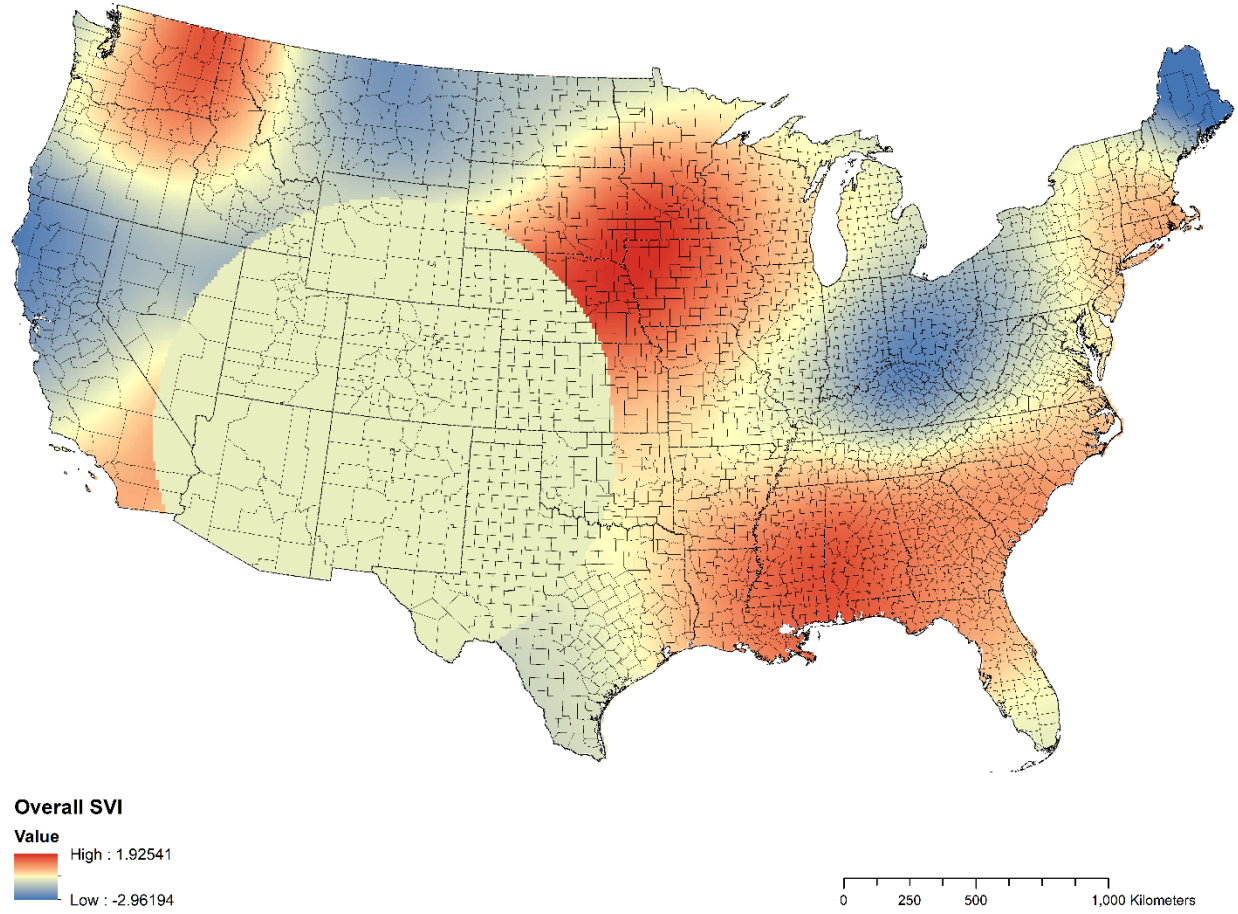

**Appendix**  
**The Impact of Social Vulnerability on COVID-19 in the U.S.:**  
**An Analysis of Spatially Varying Relationships**  
**Karaye and Horney**

**Appendix Table 1.** Multiple Linear Regression of Log-Transformed COVID-19 Case Counts (per 100,000) on Social Vulnerability Variables (N=2,844)

| <sup>b</sup> Variable   | <sup>a</sup> $e^{\beta}$ | Robust $p$ -value |
|-------------------------|--------------------------|-------------------|
| Poverty                 | 0.78                     | 0.09              |
| Unemployed              | 0.96                     | 0.65              |
| Per capita income       | <b>1.33*</b>             | 0.04              |
| No high school diploma  | <b>1.42*</b>             | 0.01              |
| Aged $\geq 65$ years    | 0.92                     | 0.51              |
| Aged $\leq 17$ years    | 0.89                     | 0.32              |
| Disability              | <b>0.40*</b>             | <0.001            |
| Single parent household | 1.18                     | 0.09              |
| Minority                | <b>6.23*</b>             | <0.001            |
| English less than well  | 1.22                     | 0.05              |
| Multiunit housing       | <b>0.76*</b>             | 0.01              |
| Mobile home             | <b>0.60*</b>             | <0.001            |
| Crowded                 | <b>0.79*</b>             | 0.02              |
| No vehicle              | 0.96                     | 0.70              |
| Institutionalized qtrs  | <b>0.81*</b>             | 0.01              |
| Model diagnostics       |                          |                   |
| Multiple $R^2$          | 0.33                     | –                 |
| Adjusted $R^2$          | 0.32                     | –                 |
| AICc                    | 8158.33                  | –                 |
| Koenker (BP) statistic  | <b>144.46*</b>           | <0.001            |

*Notes:* Boldface indicates statistical significance ( $*p < 0.05$ ).

<sup>a</sup>The outcome variable has been log-transformed; model coefficients have been exponentiated to ease interpretation.

<sup>b</sup>Variable definitions: Poverty- percentage of persons in poverty is in the 90th percentile; Unemployed- percentage of civilians unemployed is in the 90th percentile; Per capita income- Per capita income is in the 90th percentile; No High School Diploma- percentage of persons with no high school diploma is in the 90th percentile; Aged  $\geq 65$  years- percentage of persons aged  $\geq 65$  years is in the 90th percentile; Aged  $\leq 17$  years- percentage of persons aged  $\leq 17$  years is in the 90th percentile; Disability- percentage of persons with disability is in the 90th percentile; Single Parent Household- percentage of single parent households is in the 90th percentile; Minority- percentage of minority is in the 90th percentile; English less than well- percentage of those with limited English is in the 90th percentile; Multiunit Housing- percentage of households in multi-unit housing is in the 90th percentile; Mobile Home- percentage of mobile homes is in the 90th percentile; Crowded- percentage of crowded households is in the 90th percentile; No Vehicle- percentage of households with no vehicles is in the 90th percentile; Institutionalized qtrs., percentage of persons in institutionalized quarters is in the 90th percentile. The model had been adjusted for population size, population density, number of people tested, average daily sunlight, precipitation, air temperature, heat index, and fine particulate matter (PM<sub>2.5</sub>).

**Appendix**  
**The Impact of Social Vulnerability on COVID-19 in the U.S.:**  
**An Analysis of Spatially Varying Relationships**  
**Karaye and Horney**

**Appendix Table 2.** U.S. States and Counties at Increased Risk of COVID-19 Due to Overall Social Vulnerability ( $\beta \geq 1.00$ ;  $n=623$ )

| <b>FIPS</b> | <b>STATE</b> | <b>COUNTY</b> | <b>Coef (<math>\beta</math>)</b> |
|-------------|--------------|---------------|----------------------------------|
| 01001       | ALABAMA      | Autauga       | 1.52471465                       |
| 01009       | ALABAMA      | Blount        | 1.273417974                      |
| 01013       | ALABAMA      | Butler        | 1.538345567                      |
| 01015       | ALABAMA      | Calhoun       | 1.254488597                      |
| 01017       | ALABAMA      | Chambers      | 1.328636316                      |
| 01031       | ALABAMA      | Coffee        | 1.424209165                      |
| 01033       | ALABAMA      | Colbert       | 1.022852541                      |
| 01039       | ALABAMA      | Covington     | 1.493106517                      |
| 01043       | ALABAMA      | Cullman       | 1.244599256                      |
| 01045       | ALABAMA      | Dale          | 1.36379229                       |
| 01051       | ALABAMA      | Elmore        | 1.453275371                      |
| 01055       | ALABAMA      | Etowah        | 1.199031598                      |
| 01067       | ALABAMA      | Henry         | 1.307350052                      |
| 01069       | ALABAMA      | Houston       | 1.304422728                      |
| 01079       | ALABAMA      | Lawrence      | 1.102262781                      |
| 01095       | ALABAMA      | Marshall      | 1.105097413                      |
| 01097       | ALABAMA      | Mobile        | 1.606935922                      |
| 01103       | ALABAMA      | Morgan        | 1.111202196                      |
| 01111       | ALABAMA      | Randolph      | 1.302490672                      |
| 01113       | ALABAMA      | Russell       | 1.315100781                      |
| 01115       | ALABAMA      | St. Clair     | 1.323610826                      |
| 01117       | ALABAMA      | Shelby        | 1.455445924                      |
| 01121       | ALABAMA      | Talladega     | 1.377595376                      |
| 12033       | FLORIDA      | Escambia      | 1.579520774                      |
| 12113       | FLORIDA      | Santa Rosa    | 1.549495898                      |
| 13015       | GEORGIA      | Bartow        | 1.034442574                      |
| 13045       | GEORGIA      | Carroll       | 1.215909873                      |
| 13057       | GEORGIA      | Cherokee      | 1.010085255                      |
| 13073       | GEORGIA      | Columbia      | 1.06442767                       |
| 13077       | GEORGIA      | Coweta        | 1.216582936                      |
| 13113       | GEORGIA      | Fayette       | 1.184361377                      |
| 13115       | GEORGIA      | Floyd         | 1.052352216                      |
| 13143       | GEORGIA      | Haralson      | 1.187381625                      |
| 13145       | GEORGIA      | Harris        | 1.273264522                      |
| 13153       | GEORGIA      | Houston       | 1.138546264                      |
| 13157       | GEORGIA      | Jackson       | 1.005550877                      |
| 13169       | GEORGIA      | Jones         | 1.133606397                      |
| 13207       | GEORGIA      | Monroe        | 1.161289086                      |
| 13211       | GEORGIA      | Morgan        | 1.09446707                       |
| 13231       | GEORGIA      | Pike          | 1.201306099                      |
| 13233       | GEORGIA      | Polk          | 1.132572646                      |
| 13297       | GEORGIA      | Walton        | 1.081235856                      |
| 16017       | IDAHO        | Bonner        | 1.447634235                      |

**Appendix**  
**The Impact of Social Vulnerability on COVID-19 in the U.S.:**  
**An Analysis of Spatially Varying Relationships**  
**Karaye and Horney**

|       |       |             |             |
|-------|-------|-------------|-------------|
| 16055 | IDAHO | Kootenai    | 1.439691601 |
| 16069 | IDAHO | Nez Perce   | 1.204436489 |
| 19001 | IOWA  | Adair       | 1.538595524 |
| 19005 | IOWA  | Allamakee   | 1.199174946 |
| 19007 | IOWA  | Appanoose   | 1.066980259 |
| 19011 | IOWA  | Benton      | 1.20501002  |
| 19015 | IOWA  | Boone       | 1.589829423 |
| 19017 | IOWA  | Bremer      | 1.377223821 |
| 19023 | IOWA  | Butler      | 1.476692692 |
| 19027 | IOWA  | Carroll     | 1.746976777 |
| 19029 | IOWA  | Cass        | 1.614161233 |
| 19033 | IOWA  | Cerro Gordo | 1.619263342 |
| 19035 | IOWA  | Cherokee    | 1.907854288 |
| 19037 | IOWA  | Chickasaw   | 1.410577821 |
| 19039 | IOWA  | Clarke      | 1.333417401 |
| 19041 | IOWA  | Clay        | 1.894488196 |
| 19043 | IOWA  | Clayton     | 1.157578446 |
| 19055 | IOWA  | Delaware    | 1.116464016 |
| 19061 | IOWA  | Dubuque     | 1.007640236 |
| 19065 | IOWA  | Fayette     | 1.277690728 |
| 19067 | IOWA  | Floyd       | 1.517257468 |
| 19069 | IOWA  | Franklin    | 1.576547034 |
| 19071 | IOWA  | Fremont     | 1.554752374 |
| 19073 | IOWA  | Greene      | 1.674002673 |
| 19075 | IOWA  | Grundy      | 1.423402089 |
| 19077 | IOWA  | Guthrie     | 1.62216238  |
| 19079 | IOWA  | Hamilton    | 1.609487472 |
| 19081 | IOWA  | Hancock     | 1.709610369 |
| 19083 | IOWA  | Hardin      | 1.515277304 |
| 19085 | IOWA  | Harrison    | 1.794757285 |
| 19089 | IOWA  | Howard      | 1.434106059 |
| 19091 | IOWA  | Humboldt    | 1.757310869 |
| 19095 | IOWA  | Iowa        | 1.123347333 |
| 19099 | IOWA  | Jasper      | 1.33451864  |
| 19105 | IOWA  | Jones       | 1.008421469 |
| 19107 | IOWA  | Keokuk      | 1.066230902 |
| 19109 | IOWA  | Kossuth     | 1.795874484 |
| 19121 | IOWA  | Madison     | 1.453841196 |
| 19123 | IOWA  | Mahaska     | 1.166501515 |
| 19125 | IOWA  | Marion      | 1.265806039 |
| 19129 | IOWA  | Mills       | 1.634052567 |
| 19131 | IOWA  | Mitchell    | 1.541388344 |
| 19133 | IOWA  | Monona      | 1.861589064 |
| 19135 | IOWA  | Monroe      | 1.140276533 |
| 19141 | IOWA  | O'Brien     | 1.920235832 |
| 19143 | IOWA  | Osceola     | 1.914201516 |

**Appendix**  
**The Impact of Social Vulnerability on COVID-19 in the U.S.:**  
**An Analysis of Spatially Varying Relationships**  
**Karaye and Horney**

|       |           |               |             |
|-------|-----------|---------------|-------------|
| 19145 | IOWA      | Page          | 1.49616176  |
| 19147 | IOWA      | Palo Alto     | 1.850020691 |
| 19149 | IOWA      | Plymouth      | 1.92269093  |
| 19151 | IOWA      | Pocahontas    | 1.821169872 |
| 19155 | IOWA      | Pottawattamie | 1.697667895 |
| 19161 | IOWA      | Sac           | 1.831686215 |
| 19165 | IOWA      | Shelby        | 1.742475684 |
| 19171 | IOWA      | Tama          | 1.305567074 |
| 19173 | IOWA      | Taylor        | 1.427268345 |
| 19175 | IOWA      | Union         | 1.422389058 |
| 19179 | IOWA      | Wapello       | 1.04049165  |
| 19181 | IOWA      | Warren        | 1.362121219 |
| 19185 | IOWA      | Wayne         | 1.165651012 |
| 19187 | IOWA      | Webster       | 1.704080663 |
| 19189 | IOWA      | Winnebago     | 1.728945511 |
| 19195 | IOWA      | Worth         | 1.641133089 |
| 19197 | IOWA      | Wright        | 1.669399335 |
| 20013 | KANSAS    | Brown         | 1.251456803 |
| 20027 | KANSAS    | Clay          | 1.183028669 |
| 20041 | KANSAS    | Dickinson     | 1.025824311 |
| 20085 | KANSAS    | Jackson       | 1.125368387 |
| 20087 | KANSAS    | Jefferson     | 1.029414418 |
| 20131 | KANSAS    | Nemaha        | 1.273046112 |
| 22055 | LOUISIANA | Lafayette     | 1.115275317 |
| 22063 | LOUISIANA | Livingston    | 1.337961275 |
| 22093 | LOUISIANA | St. James     | 1.283939193 |
| 22101 | LOUISIANA | St. Mary      | 1.157897705 |
| 22103 | LOUISIANA | St. Tammany   | 1.437454367 |
| 22105 | LOUISIANA | Tangipahoa    | 1.401529362 |
| 22109 | LOUISIANA | Terrebonne    | 1.20625914  |
| 22113 | LOUISIANA | Vermilion     | 1.043808421 |
| 27003 | MINNESOTA | Anoka         | 1.338056802 |
| 27015 | MINNESOTA | Brown         | 1.783861634 |
| 27023 | MINNESOTA | Chippewa      | 1.544134108 |
| 27025 | MINNESOTA | Chisago       | 1.205473932 |
| 27033 | MINNESOTA | Cottonwood    | 1.843828397 |
| 27041 | MINNESOTA | Douglas       | 1.119268396 |
| 27043 | MINNESOTA | Faribault     | 1.764387642 |
| 27045 | MINNESOTA | Fillmore      | 1.388273633 |
| 27047 | MINNESOTA | Freeborn      | 1.663293655 |
| 27049 | MINNESOTA | Goodhue       | 1.474292801 |
| 27051 | MINNESOTA | Grant         | 1.069920423 |
| 27055 | MINNESOTA | Houston       | 1.237811888 |
| 27059 | MINNESOTA | Isanti        | 1.235064628 |
| 27063 | MINNESOTA | Jackson       | 1.882880378 |
| 27065 | MINNESOTA | Kanabec       | 1.073373311 |



**Appendix**  
**The Impact of Social Vulnerability on COVID-19 in the U.S.:**  
**An Analysis of Spatially Varying Relationships**  
**Karaye and Horney**

|       |             |                 |             |
|-------|-------------|-----------------|-------------|
| 27067 | MINNESOTA   | Kandiyohi       | 1.509598387 |
| 27079 | MINNESOTA   | Le Sueur        | 1.658134189 |
| 27085 | MINNESOTA   | McLeod          | 1.60417239  |
| 27091 | MINNESOTA   | Martin          | 1.839274159 |
| 27093 | MINNESOTA   | Meeker          | 1.513619811 |
| 27097 | MINNESOTA   | Morrison        | 1.10198831  |
| 27121 | MINNESOTA   | Pope            | 1.297163908 |
| 27127 | MINNESOTA   | Redwood         | 1.761804301 |
| 27129 | MINNESOTA   | Renville        | 1.665910731 |
| 27133 | MINNESOTA   | Rock            | 1.869488085 |
| 27143 | MINNESOTA   | Sibley          | 1.670871194 |
| 27147 | MINNESOTA   | Steele          | 1.622800433 |
| 27151 | MINNESOTA   | Swift           | 1.424663413 |
| 27153 | MINNESOTA   | Todd            | 1.072393524 |
| 27157 | MINNESOTA   | Wabasha         | 1.383209184 |
| 27161 | MINNESOTA   | Waseca          | 1.685954089 |
| 27163 | MINNESOTA   | Washington      | 1.358107752 |
| 27173 | MINNESOTA   | Yellow Medicine | 1.640229934 |
| 28045 | MISSISSIPPI | Hancock         | 1.491002374 |
| 28057 | MISSISSIPPI | Itawamba        | 1.194974117 |
| 28059 | MISSISSIPPI | Jackson         | 1.573059824 |
| 28081 | MISSISSIPPI | Lee             | 1.166968602 |
| 28089 | MISSISSIPPI | Madison         | 1.468658251 |
| 28095 | MISSISSIPPI | Monroe          | 1.333570923 |
| 28109 | MISSISSIPPI | Pearl River     | 1.5123592   |
| 28121 | MISSISSIPPI | Rankin          | 1.514715723 |
| 28129 | MISSISSIPPI | Smith           | 1.570549237 |
| 28159 | MISSISSIPPI | Winston         | 1.503336801 |
| 28161 | MISSISSIPPI | Yalobusha       | 1.149096849 |
| 29003 | MISSOURI    | Andrew          | 1.216794265 |
| 29021 | MISSOURI    | Buchanan        | 1.112068247 |
| 29049 | MISSOURI    | Clinton         | 1.038467327 |
| 29061 | MISSOURI    | Daviess         | 1.080313321 |
| 29075 | MISSOURI    | Gentry          | 1.227735352 |
| 29081 | MISSOURI    | Harrison        | 1.19671796  |
| 29087 | MISSOURI    | Holt            | 1.304375333 |
| 29227 | MISSOURI    | Worth           | 1.307935547 |
| 31003 | NEBRASKA    | Antelope        | 1.820580718 |
| 31011 | NEBRASKA    | Boone           | 1.807184712 |
| 31021 | NEBRASKA    | Burt            | 1.852281557 |
| 31023 | NEBRASKA    | Butler          | 1.765434968 |
| 31025 | NEBRASKA    | Cass            | 1.650091073 |
| 31027 | NEBRASKA    | Cedar           | 1.87891823  |
| 31039 | NEBRASKA    | Cuming          | 1.868777661 |
| 31051 | NEBRASKA    | Dixon           | 1.902499468 |
| 31053 | NEBRASKA    | Dodge           | 1.821773727 |

**Appendix**  
**The Impact of Social Vulnerability on COVID-19 in the U.S.:**  
**An Analysis of Spatially Varying Relationships**  
**Karaye and Horney**

|       |                |            |             |
|-------|----------------|------------|-------------|
| 31059 | NEBRASKA       | Fillmore   | 1.592261402 |
| 31067 | NEBRASKA       | Gage       | 1.484291721 |
| 31081 | NEBRASKA       | Hamilton   | 1.682787245 |
| 31089 | NEBRASKA       | Holt       | 1.726208532 |
| 31095 | NEBRASKA       | Jefferson  | 1.472381869 |
| 31107 | NEBRASKA       | Knox       | 1.815365186 |
| 31121 | NEBRASKA       | Merrick    | 1.742067845 |
| 31125 | NEBRASKA       | Nance      | 1.779360543 |
| 31127 | NEBRASKA       | Nemaha     | 1.469386595 |
| 31131 | NEBRASKA       | Otoe       | 1.575321245 |
| 31139 | NEBRASKA       | Pierce     | 1.856940735 |
| 31143 | NEBRASKA       | Polk       | 1.7553823   |
| 31155 | NEBRASKA       | Saunders   | 1.755385485 |
| 31167 | NEBRASKA       | Stanton    | 1.861969259 |
| 31177 | NEBRASKA       | Washington | 1.796049621 |
| 31185 | NEBRASKA       | York       | 1.686506451 |
| 41061 | OREGON         | Union      | 1.02755094  |
| 45003 | SOUTH CAROLINA | Aiken      | 1.060790754 |
| 45015 | SOUTH CAROLINA | Berkeley   | 1.068758401 |
| 45035 | SOUTH CAROLINA | Dorchester | 1.061459697 |
| 45063 | SOUTH CAROLINA | Lexington  | 1.03711346  |
| 46025 | SOUTH DAKOTA   | Clark      | 1.27765691  |
| 46029 | SOUTH DAKOTA   | Codington  | 1.346063569 |
| 46039 | SOUTH DAKOTA   | Deuel      | 1.529194311 |
| 46043 | SOUTH DAKOTA   | Douglas    | 1.622915998 |
| 46051 | SOUTH DAKOTA   | Grant      | 1.339882168 |
| 46059 | SOUTH DAKOTA   | Hand       | 1.075361703 |
| 46067 | SOUTH DAKOTA   | Hutchinson | 1.742675535 |
| 46079 | SOUTH DAKOTA   | Lake       | 1.693930167 |
| 46097 | SOUTH DAKOTA   | Miner      | 1.605416198 |
| 46101 | SOUTH DAKOTA   | Moody      | 1.761138278 |
| 46111 | SOUTH DAKOTA   | Sanborn    | 1.502795428 |
| 46115 | SOUTH DAKOTA   | Spink      | 1.088693282 |
| 46125 | SOUTH DAKOTA   | Turner     | 1.83305522  |
| 53003 | WASHINGTON     | Asotin     | 1.250206453 |
| 53065 | WASHINGTON     | Stevens    | 1.618162534 |
| 55005 | WISCONSIN      | Barron     | 1.044700223 |
| 55011 | WISCONSIN      | Buffalo    | 1.256259048 |
| 55017 | WISCONSIN      | Chippewa   | 1.013516929 |
| 55023 | WISCONSIN      | Crawford   | 1.085998793 |
| 55035 | WISCONSIN      | Eau Claire | 1.084467642 |
| 55043 | WISCONSIN      | Grant      | 1.010048189 |
| 55053 | WISCONSIN      | Jackson    | 1.020302983 |
| 55081 | WISCONSIN      | Monroe     | 1.002112788 |
| 55093 | WISCONSIN      | Pierce     | 1.351684829 |
| 55095 | WISCONSIN      | Polk       | 1.144335575 |

**Appendix**  
**The Impact of Social Vulnerability on COVID-19 in the U.S.:**  
**An Analysis of Spatially Varying Relationships**  
**Karaye and Horney**

|       |           |             |             |
|-------|-----------|-------------|-------------|
| 55109 | WISCONSIN | St. Croix   | 1.27887745  |
| 55121 | WISCONSIN | Trempealeau | 1.165629842 |
| 55123 | WISCONSIN | Vernon      | 1.068035132 |
| 01003 | ALABAMA   | Baldwin     | 1.60122253  |
| 01019 | ALABAMA   | Cherokee    | 1.116214262 |
| 01021 | ALABAMA   | Chilton     | 1.512936615 |
| 01027 | ALABAMA   | Clay        | 1.355380126 |
| 01041 | ALABAMA   | Crenshaw    | 1.484202555 |
| 01049 | ALABAMA   | DeKalb      | 1.021950728 |
| 01057 | ALABAMA   | Fayette     | 1.414034782 |
| 01061 | ALABAMA   | Geneva      | 1.390123808 |
| 01073 | ALABAMA   | Jefferson   | 1.421124402 |
| 01075 | ALABAMA   | Lamar       | 1.392172377 |
| 01081 | ALABAMA   | Lee         | 1.337188319 |
| 01093 | ALABAMA   | Marion      | 1.272658365 |
| 01109 | ALABAMA   | Pike        | 1.426908168 |
| 01123 | ALABAMA   | Tallapoosa  | 1.388277546 |
| 01125 | ALABAMA   | Tuscaloosa  | 1.516304664 |
| 05003 | ARKANSAS  | Ashley      | 1.115314433 |
| 05043 | ARKANSAS  | Drew        | 1.02621691  |
| 12005 | FLORIDA   | Bay         | 1.323892034 |
| 12037 | FLORIDA   | Franklin    | 1.182590418 |
| 12045 | FLORIDA   | Gulf        | 1.249690769 |
| 12073 | FLORIDA   | Leon        | 1.13103177  |
| 12091 | FLORIDA   | Okaloosa    | 1.493920162 |
| 12131 | FLORIDA   | Walton      | 1.427033516 |
| 13013 | GEORGIA   | Barrow      | 1.039672055 |
| 13035 | GEORGIA   | Butts       | 1.149618381 |
| 13067 | GEORGIA   | Cobb        | 1.099678756 |
| 13103 | GEORGIA   | Effingham   | 1.015406524 |
| 13131 | GEORGIA   | Grady       | 1.140728071 |
| 13133 | GEORGIA   | Greene      | 1.084451837 |
| 13149 | GEORGIA   | Heard       | 1.262286254 |
| 13159 | GEORGIA   | Jasper      | 1.130197345 |
| 13171 | GEORGIA   | Lamar       | 1.177742601 |
| 13177 | GEORGIA   | Lee         | 1.164786753 |
| 13181 | GEORGIA   | Lincoln     | 1.047448358 |
| 13185 | GEORGIA   | Lowndes     | 1.034308879 |
| 13195 | GEORGIA   | Madison     | 1.000470677 |
| 13201 | GEORGIA   | Miller      | 1.218378317 |
| 13219 | GEORGIA   | Oconee      | 1.060423699 |
| 13221 | GEORGIA   | Oglethorpe  | 1.045171888 |
| 13223 | GEORGIA   | Paulding    | 1.126578121 |
| 13237 | GEORGIA   | Putnam      | 1.110349077 |
| 13255 | GEORGIA   | Spalding    | 1.179909299 |
| 13275 | GEORGIA   | Thomas      | 1.103013394 |

**Appendix**  
**The Impact of Social Vulnerability on COVID-19 in the U.S.:**  
**An Analysis of Spatially Varying Relationships**  
**Karaye and Horney**

|       |           |                  |             |
|-------|-----------|------------------|-------------|
| 13285 | GEORGIA   | Troup            | 1.273819109 |
| 13293 | GEORGIA   | Upson            | 1.200544916 |
| 13317 | GEORGIA   | Wilkes           | 1.05240457  |
| 19009 | IOWA      | Audubon          | 1.687831167 |
| 19013 | IOWA      | Black Hawk       | 1.328510588 |
| 19019 | IOWA      | Buchanan         | 1.223415459 |
| 19025 | IOWA      | Calhoun          | 1.770898768 |
| 19059 | IOWA      | Dickinson        | 1.897479522 |
| 19103 | IOWA      | Johnson          | 1.016661032 |
| 19113 | IOWA      | Linn             | 1.102282643 |
| 19119 | IOWA      | Lyon             | 1.905174684 |
| 19127 | IOWA      | Marshall         | 1.397609206 |
| 19137 | IOWA      | Montgomery       | 1.575321645 |
| 19153 | IOWA      | Polk             | 1.445532812 |
| 19157 | IOWA      | Poweshiek        | 1.22402891  |
| 19167 | IOWA      | Sioux            | 1.922403151 |
| 19191 | IOWA      | Winneshiek       | 1.315437142 |
| 19193 | IOWA      | Woodbury         | 1.901129071 |
| 20005 | KANSAS    | Atchison         | 1.124130132 |
| 20043 | KANSAS    | Doniphan         | 1.195334502 |
| 20149 | KANSAS    | Pottawatomie     | 1.148446197 |
| 22005 | LOUISIANA | Ascension        | 1.286959492 |
| 22057 | LOUISIANA | Lafourche        | 1.283606158 |
| 22073 | LOUISIANA | Ouachita         | 1.154404339 |
| 22079 | LOUISIANA | Rapides          | 1.096222212 |
| 22089 | LOUISIANA | St. Charles      | 1.331265266 |
| 22099 | LOUISIANA | St. Martin       | 1.17701427  |
| 22111 | LOUISIANA | Union            | 1.069528519 |
| 22121 | LOUISIANA | West Baton Rouge | 1.254320917 |
| 22123 | LOUISIANA | West Carroll     | 1.240994289 |
| 22125 | LOUISIANA | West Feliciana   | 1.274303372 |
| 27009 | MINNESOTA | Benton           | 1.240661395 |
| 27011 | MINNESOTA | Big Stone        | 1.277155434 |
| 27013 | MINNESOTA | Blue Earth       | 1.754464707 |
| 27019 | MINNESOTA | Carver           | 1.559224658 |
| 27037 | MINNESOTA | Dakota           | 1.488803045 |
| 27039 | MINNESOTA | Dodge            | 1.550410017 |
| 27073 | MINNESOTA | Lac qui Parle    | 1.502724156 |
| 27081 | MINNESOTA | Lincoln          | 1.703151228 |
| 27083 | MINNESOTA | Lyon             | 1.739311386 |
| 27095 | MINNESOTA | Mille Lacs       | 1.105845158 |
| 27099 | MINNESOTA | Mower            | 1.54156845  |
| 27101 | MINNESOTA | Murray           | 1.837115247 |
| 27109 | MINNESOTA | Olmsted          | 1.450527941 |
| 27117 | MINNESOTA | Pipestone        | 1.805836588 |
| 27131 | MINNESOTA | Rice             | 1.592858614 |

**Appendix**  
**The Impact of Social Vulnerability on COVID-19 in the U.S.:**  
**An Analysis of Spatially Varying Relationships**  
**Karaye and Horney**

|       |                |             |             |
|-------|----------------|-------------|-------------|
| 27139 | MINNESOTA      | Scott       | 1.570510276 |
| 27141 | MINNESOTA      | Sherburne   | 1.333533081 |
| 27145 | MINNESOTA      | Stearns     | 1.332506508 |
| 27149 | MINNESOTA      | Stevens     | 1.250422245 |
| 27155 | MINNESOTA      | Traverse    | 1.095134795 |
| 27165 | MINNESOTA      | Watonwan    | 1.818042702 |
| 27169 | MINNESOTA      | Winona      | 1.300725775 |
| 27171 | MINNESOTA      | Wright      | 1.457479511 |
| 28019 | MISSISSIPPI    | Choctaw     | 1.421911987 |
| 28037 | MISSISSIPPI    | Franklin    | 1.393503417 |
| 28067 | MISSISSIPPI    | Jones       | 1.59821276  |
| 28073 | MISSISSIPPI    | Lamar       | 1.551359412 |
| 28075 | MISSISSIPPI    | Lauderdale  | 1.618231673 |
| 28077 | MISSISSIPPI    | Lawrence    | 1.502512455 |
| 28085 | MISSISSIPPI    | Lincoln     | 1.45840216  |
| 28131 | MISSISSIPPI    | Stone       | 1.557478261 |
| 28149 | MISSISSIPPI    | Warren      | 1.387106972 |
| 28155 | MISSISSIPPI    | Webster     | 1.344342284 |
| 29005 | MISSOURI       | Atchison    | 1.43962903  |
| 29147 | MISSOURI       | Nodaway     | 1.345898416 |
| 29165 | MISSOURI       | Platte      | 1.015846045 |
| 31055 | NEBRASKA       | Douglas     | 1.744718669 |
| 31077 | NEBRASKA       | Greeley     | 1.771074297 |
| 31097 | NEBRASKA       | Johnson     | 1.504393729 |
| 31109 | NEBRASKA       | Lancaster   | 1.647507909 |
| 31119 | NEBRASKA       | Madison     | 1.846596251 |
| 31141 | NEBRASKA       | Platte      | 1.817162559 |
| 31151 | NEBRASKA       | Saline      | 1.585250858 |
| 31159 | NEBRASKA       | Seward      | 1.684167457 |
| 31179 | NEBRASKA       | Wayne       | 1.884179781 |
| 41063 | OREGON         | Wallowa     | 1.046295032 |
| 45017 | SOUTH CAROLINA | Calhoun     | 1.056974174 |
| 45019 | SOUTH CAROLINA | Charleston  | 1.055206262 |
| 45037 | SOUTH CAROLINA | Edgefield   | 1.046923817 |
| 45041 | SOUTH CAROLINA | Florence    | 1.023398942 |
| 45043 | SOUTH CAROLINA | Georgetown  | 1.069970532 |
| 45051 | SOUTH CAROLINA | Horry       | 1.026277497 |
| 46003 | SOUTH DAKOTA   | Aurora      | 1.490702083 |
| 46009 | SOUTH DAKOTA   | Bon Homme   | 1.778110589 |
| 46023 | SOUTH DAKOTA   | Charles Mix | 1.622230033 |
| 46035 | SOUTH DAKOTA   | Davison     | 1.593379038 |
| 46037 | SOUTH DAKOTA   | Day         | 1.079321835 |
| 46057 | SOUTH DAKOTA   | Hamlin      | 1.469848353 |
| 46073 | SOUTH DAKOTA   | Jerauld     | 1.360146522 |
| 46087 | SOUTH DAKOTA   | McCook      | 1.738414309 |
| 46099 | SOUTH DAKOTA   | Minnehaha   | 1.819927649 |

**Appendix**  
**The Impact of Social Vulnerability on COVID-19 in the U.S.:**  
**An Analysis of Spatially Varying Relationships**  
**Karaye and Horney**

|       |              |                  |             |
|-------|--------------|------------------|-------------|
| 46127 | SOUTH DAKOTA | Union            | 1.91143575  |
| 46135 | SOUTH DAKOTA | Yankton          | 1.838747406 |
| 53005 | WASHINGTON   | Benton           | 1.203808771 |
| 53043 | WASHINGTON   | Lincoln          | 1.553057466 |
| 53063 | WASHINGTON   | Spokane          | 1.557985387 |
| 53071 | WASHINGTON   | Walla Walla      | 1.324416207 |
| 55033 | WISCONSIN    | Dunn             | 1.184248102 |
| 55063 | WISCONSIN    | La Crosse        | 1.133234901 |
| 01007 | ALABAMA      | Bibb             | 1.539404539 |
| 01037 | ALABAMA      | Coosa            | 1.444479921 |
| 01053 | ALABAMA      | Escambia         | 1.580206351 |
| 01101 | ALABAMA      | Montgomery       | 1.470660631 |
| 01107 | ALABAMA      | Pickens          | 1.523525484 |
| 01127 | ALABAMA      | Walker           | 1.380641657 |
| 01129 | ALABAMA      | Washington       | 1.637320816 |
| 12065 | FLORIDA      | Jefferson        | 1.083406817 |
| 12129 | FLORIDA      | Wakulla          | 1.135925358 |
| 13007 | GEORGIA      | Baker            | 1.185289366 |
| 13023 | GEORGIA      | Bleckley         | 1.11002534  |
| 13031 | GEORGIA      | Bulloch          | 1.026618806 |
| 13053 | GEORGIA      | Chattahoochee    | 1.260384607 |
| 13075 | GEORGIA      | Cook             | 1.063417684 |
| 13079 | GEORGIA      | Crawford         | 1.170834855 |
| 13199 | GEORGIA      | Meriwether       | 1.234337061 |
| 13209 | GEORGIA      | Montgomery       | 1.0458019   |
| 13217 | GEORGIA      | Newton           | 1.117561535 |
| 13247 | GEORGIA      | Rockdale         | 1.117537722 |
| 13251 | GEORGIA      | Screven          | 1.046353783 |
| 13253 | GEORGIA      | Seminole         | 1.229845257 |
| 13263 | GEORGIA      | Talbot           | 1.22884845  |
| 13277 | GEORGIA      | Tift             | 1.085711971 |
| 13283 | GEORGIA      | Treutlen         | 1.059783012 |
| 13319 | GEORGIA      | Wilkinson        | 1.10822087  |
| 13321 | GEORGIA      | Worth            | 1.122787801 |
| 16057 | IDAHO        | Latah            | 1.312690866 |
| 19047 | IOWA         | Crawford         | 1.812031854 |
| 19049 | IOWA         | Dallas           | 1.538339802 |
| 19169 | IOWA         | Story            | 1.496524542 |
| 20061 | KANSAS       | Geary            | 1.043560598 |
| 20161 | KANSAS       | Riley            | 1.141684099 |
| 22001 | LOUISIANA    | Acadia           | 1.066353569 |
| 22003 | LOUISIANA    | Allen            | 1.014381103 |
| 22007 | LOUISIANA    | Assumption       | 1.231971978 |
| 22033 | LOUISIANA    | East Baton Rouge | 1.294456362 |
| 22037 | LOUISIANA    | East Feliciana   | 1.329171029 |
| 22047 | LOUISIANA    | Iberville        | 1.227686107 |

**Appendix**  
**The Impact of Social Vulnerability on COVID-19 in the U.S.:**  
**An Analysis of Spatially Varying Relationships**  
**Karaye and Horney**

|       |                |                      |             |
|-------|----------------|----------------------|-------------|
| 22051 | LOUISIANA      | Jefferson            | 1.348801178 |
| 22059 | LOUISIANA      | LaSalle              | 1.182451596 |
| 22075 | LOUISIANA      | Plaquemines          | 1.376093191 |
| 22077 | LOUISIANA      | Pointe Coupee        | 1.232183565 |
| 22095 | LOUISIANA      | St. John the Baptist | 1.341237058 |
| 22127 | LOUISIANA      | Winn                 | 1.082576232 |
| 27053 | MINNESOTA      | Hennepin             | 1.46102803  |
| 27103 | MINNESOTA      | Nicollet             | 1.724125865 |
| 28005 | MISSISSIPPI    | Amite                | 1.391482373 |
| 28015 | MISSISSIPPI    | Carroll              | 1.314347462 |
| 28023 | MISSISSIPPI    | Clarke               | 1.63164786  |
| 28039 | MISSISSIPPI    | George               | 1.595380272 |
| 28043 | MISSISSIPPI    | Grenada              | 1.230183388 |
| 28071 | MISSISSIPPI    | Lafayette            | 1.053230522 |
| 28087 | MISSISSIPPI    | Lowndes              | 1.46305771  |
| 28091 | MISSISSIPPI    | Marion               | 1.520804067 |
| 28111 | MISSISSIPPI    | Perry                | 1.592567486 |
| 28117 | MISSISSIPPI    | Prentiss             | 1.037081413 |
| 28145 | MISSISSIPPI    | Union                | 1.052704936 |
| 28147 | MISSISSIPPI    | Walthall             | 1.482946229 |
| 29063 | MISSOURI       | DeKalb               | 1.129704523 |
| 30053 | MONTANA        | Lincoln              | 1.001185504 |
| 31153 | NEBRASKA       | Sarpy                | 1.700089994 |
| 41059 | OREGON         | Umatilla             | 1.127196902 |
| 45013 | SOUTH CAROLINA | Beaufort             | 1.011590537 |
| 45029 | SOUTH CAROLINA | Colleton             | 1.048617245 |
| 45081 | SOUTH CAROLINA | Saluda               | 1.022069205 |
| 45085 | SOUTH CAROLINA | Sumter               | 1.038980254 |
| 46011 | SOUTH DAKOTA   | Brookings            | 1.647277925 |
| 46083 | SOUTH DAKOTA   | Lincoln              | 1.881153579 |
| 46109 | SOUTH DAKOTA   | Roberts              | 1.089202063 |
| 53013 | WASHINGTON     | Columbia             | 1.346190307 |
| 53017 | WASHINGTON     | Douglas              | 1.298525831 |
| 53019 | WASHINGTON     | Ferry                | 1.566547874 |
| 53047 | WASHINGTON     | Okanogan             | 1.261741894 |
| 53051 | WASHINGTON     | Pend Oreille         | 1.58405366  |
| 01025 | ALABAMA        | Clarke               | 1.640521651 |
| 01029 | ALABAMA        | Cleburne             | 1.245475139 |
| 01059 | ALABAMA        | Franklin             | 1.145929251 |
| 01133 | ALABAMA        | Winston              | 1.26525306  |
| 12063 | FLORIDA        | Jackson              | 1.277232489 |
| 12133 | FLORIDA        | Washington           | 1.343470481 |
| 13001 | GEORGIA        | Appling              | 1.007066814 |
| 13009 | GEORGIA        | Baldwin              | 1.112983343 |
| 13027 | GEORGIA        | Brooks               | 1.065095559 |
| 13033 | GEORGIA        | Burke                | 1.066091895 |

**Appendix**  
**The Impact of Social Vulnerability on COVID-19 in the U.S.:**  
**An Analysis of Spatially Varying Relationships**  
**Karaye and Horney**

|       |                |             |             |
|-------|----------------|-------------|-------------|
| 13059 | GEORGIA        | Clarke      | 1.03977448  |
| 13087 | GEORGIA        | Decatur     | 1.186227488 |
| 13089 | GEORGIA        | DeKalb      | 1.110988382 |
| 13091 | GEORGIA        | Dodge       | 1.087375273 |
| 13097 | GEORGIA        | Douglas     | 1.165786002 |
| 13121 | GEORGIA        | Fulton      | 1.124662512 |
| 13125 | GEORGIA        | Glascocock  | 1.082262247 |
| 13151 | GEORGIA        | Henry       | 1.15133313  |
| 13155 | GEORGIA        | Irwin       | 1.069293544 |
| 13173 | GEORGIA        | Lanier      | 1.02493729  |
| 13175 | GEORGIA        | Laurens     | 1.083293654 |
| 13189 | GEORGIA        | McDuffie    | 1.070789029 |
| 13197 | GEORGIA        | Marion      | 1.227358092 |
| 13225 | GEORGIA        | Peach       | 1.155170169 |
| 13245 | GEORGIA        | Richmond    | 1.069076513 |
| 13249 | GEORGIA        | Schley      | 1.200943426 |
| 13279 | GEORGIA        | Toombs      | 1.031786443 |
| 13287 | GEORGIA        | Turner      | 1.106612066 |
| 13315 | GEORGIA        | Wilcox      | 1.099985271 |
| 19021 | IOWA           | Buena Vista | 1.873728109 |
| 22009 | LOUISIANA      | Avoyelles   | 1.189420843 |
| 22021 | LOUISIANA      | Caldwell    | 1.186077908 |
| 22025 | LOUISIANA      | Catahoula   | 1.241933688 |
| 22043 | LOUISIANA      | Grant       | 1.101097148 |
| 22045 | LOUISIANA      | Iberia      | 1.136728565 |
| 22061 | LOUISIANA      | Lincoln     | 1.03746934  |
| 22067 | LOUISIANA      | Morehouse   | 1.178350256 |
| 22083 | LOUISIANA      | Richland    | 1.232298019 |
| 22087 | LOUISIANA      | St. Bernard | 1.428052552 |
| 27105 | MINNESOTA      | Nobles      | 1.890676066 |
| 27123 | MINNESOTA      | Ramsey      | 1.400712703 |
| 28017 | MISSISSIPPI    | Chickasaw   | 1.281307851 |
| 28025 | MISSISSIPPI    | Clay        | 1.386269734 |
| 28035 | MISSISSIPPI    | Forrest     | 1.572521493 |
| 28047 | MISSISSIPPI    | Harrison    | 1.534490352 |
| 28049 | MISSISSIPPI    | Hinds       | 1.451390375 |
| 28061 | MISSISSIPPI    | Jasper      | 1.604177176 |
| 28101 | MISSISSIPPI    | Newton      | 1.587519352 |
| 28105 | MISSISSIPPI    | Oktibbeha   | 1.44005601  |
| 28127 | MISSISSIPPI    | Simpson     | 1.528728448 |
| 28153 | MISSISSIPPI    | Wayne       | 1.629467396 |
| 45079 | SOUTH CAROLINA | Richland    | 1.02524599  |
| 46005 | SOUTH DAKOTA   | Beadle      | 1.320414407 |
| 46027 | SOUTH DAKOTA   | Clay        | 1.887596983 |
| 46085 | SOUTH DAKOTA   | Lyman       | 1.125667594 |
| 53075 | WASHINGTON     | Whitman     | 1.463310369 |



**Appendix**  
**The Impact of Social Vulnerability on COVID-19 in the U.S.:**  
**An Analysis of Spatially Varying Relationships**  
**Karaye and Horney**

|       |                |                 |             |
|-------|----------------|-----------------|-------------|
| 01023 | ALABAMA        | Choctaw         | 1.645688648 |
| 01035 | ALABAMA        | Conecuh         | 1.571831487 |
| 01091 | ALABAMA        | Marengo         | 1.636080057 |
| 01099 | ALABAMA        | Monroe          | 1.611753558 |
| 05041 | ARKANSAS       | Desha           | 1.016766494 |
| 13005 | GEORGIA        | Bacon           | 1.00524347  |
| 13017 | GEORGIA        | Ben Hill        | 1.071819739 |
| 13021 | GEORGIA        | Bibb            | 1.145996314 |
| 13069 | GEORGIA        | Coffee          | 1.032071384 |
| 13081 | GEORGIA        | Crisp           | 1.129810523 |
| 13107 | GEORGIA        | Emanuel         | 1.057470443 |
| 13135 | GEORGIA        | Gwinnett        | 1.062162654 |
| 13165 | GEORGIA        | Jenkins         | 1.055872827 |
| 13167 | GEORGIA        | Johnson         | 1.077323482 |
| 13235 | GEORGIA        | Pulaski         | 1.1148292   |
| 13269 | GEORGIA        | Taylor          | 1.197501191 |
| 13289 | GEORGIA        | Twiggs          | 1.123516095 |
| 13307 | GEORGIA        | Webster         | 1.224023933 |
| 22049 | LOUISIANA      | Jackson         | 1.084078043 |
| 22071 | LOUISIANA      | Orleans         | 1.40532696  |
| 22091 | LOUISIANA      | St. Helena      | 1.376574582 |
| 28007 | MISSISSIPPI    | Attala          | 1.445855798 |
| 28029 | MISSISSIPPI    | Copiah          | 1.464195013 |
| 28031 | MISSISSIPPI    | Covington       | 1.565005732 |
| 28041 | MISSISSIPPI    | Greene          | 1.616367859 |
| 28065 | MISSISSIPPI    | Jefferson Davis | 1.53578174  |
| 28097 | MISSISSIPPI    | Montgomery      | 1.338743486 |
| 28099 | MISSISSIPPI    | Neshoba         | 1.552175989 |
| 28113 | MISSISSIPPI    | Pike            | 1.447041704 |
| 28115 | MISSISSIPPI    | Pontotoc        | 1.157933082 |
| 31037 | NEBRASKA       | Colfax          | 1.824668161 |
| 45027 | SOUTH CAROLINA | Clarendon       | 1.058928979 |
| 45049 | SOUTH CAROLINA | Hampton         | 1.042478173 |
| 45065 | SOUTH CAROLINA | McCormick       | 1.034689095 |
| 53025 | WASHINGTON     | Grant           | 1.341192805 |
| 01065 | ALABAMA        | Hale            | 1.596994513 |
| 12013 | FLORIDA        | Calhoun         | 1.260490447 |
| 12077 | FLORIDA        | Liberty         | 1.206995371 |
| 12079 | FLORIDA        | Madison         | 1.037076606 |
| 12123 | FLORIDA        | Taylor          | 1.032395972 |
| 13019 | GEORGIA        | Berrien         | 1.05008776  |
| 13063 | GEORGIA        | Clayton         | 1.156499717 |
| 13095 | GEORGIA        | Dougherty       | 1.164413589 |
| 13099 | GEORGIA        | Early           | 1.249616065 |
| 13109 | GEORGIA        | Evans           | 1.014460646 |
| 13215 | GEORGIA        | Muscogee        | 1.272561282 |

**Appendix**  
**The Impact of Social Vulnerability on COVID-19 in the U.S.:**  
**An Analysis of Spatially Varying Relationships**  
**Karaye and Horney**

|       |                |              |             |
|-------|----------------|--------------|-------------|
| 13261 | GEORGIA        | Sumter       | 1.181027194 |
| 13267 | GEORGIA        | Tattnall     | 1.014016637 |
| 13301 | GEORGIA        | Warren       | 1.078916709 |
| 13303 | GEORGIA        | Washington   | 1.090250747 |
| 28013 | MISSISSIPPI    | Calhoun      | 1.230007918 |
| 31043 | NEBRASKA       | Dakota       | 1.907170883 |
| 45009 | SOUTH CAROLINA | Bamberg      | 1.061765365 |
| 45053 | SOUTH CAROLINA | Jasper       | 1.016932343 |
| 45075 | SOUTH CAROLINA | Orangeburg   | 1.064072337 |
| 45089 | SOUTH CAROLINA | Williamsburg | 1.061253347 |
| 01047 | ALABAMA        | Dallas       | 1.587610326 |
| 01087 | ALABAMA        | Macon        | 1.391032239 |
| 01119 | ALABAMA        | Sumter       | 1.620076907 |
| 05017 | ARKANSAS       | Chicot       | 1.171941868 |
| 13043 | GEORGIA        | Candler      | 1.037935642 |
| 13061 | GEORGIA        | Clay         | 1.271250701 |
| 13161 | GEORGIA        | Jeff Davis   | 1.030967674 |
| 13163 | GEORGIA        | Jefferson    | 1.076335421 |
| 13205 | GEORGIA        | Mitchell     | 1.149657092 |
| 13243 | GEORGIA        | Randolph     | 1.243276241 |
| 13271 | GEORGIA        | Telfair      | 1.058394999 |
| 13273 | GEORGIA        | Terrell      | 1.201152713 |
| 22029 | LOUISIANA      | Concordia    | 1.272082085 |
| 22041 | LOUISIANA      | Franklin     | 1.266385468 |
| 22097 | LOUISIANA      | St. Landry   | 1.157463468 |
| 22107 | LOUISIANA      | Tensas       | 1.328543553 |
| 22117 | LOUISIANA      | Washington   | 1.468289254 |
| 28069 | MISSISSIPPI    | Kemper       | 1.585425421 |
| 28125 | MISSISSIPPI    | Sharkey      | 1.326568731 |
| 28151 | MISSISSIPPI    | Washington   | 1.219173964 |
| 31173 | NEBRASKA       | Thurston     | 1.890892825 |
| 45011 | SOUTH CAROLINA | Barnwell     | 1.062796161 |
| 45061 | SOUTH CAROLINA | Lee          | 1.007551366 |
| 53021 | WASHINGTON     | Franklin     | 1.355105489 |
| 01011 | ALABAMA        | Bullock      | 1.395130732 |
| 01131 | ALABAMA        | Wilcox       | 1.611534063 |
| 12039 | FLORIDA        | Gadsden      | 1.179940666 |
| 12059 | FLORIDA        | Holmes       | 1.377490695 |
| 13003 | GEORGIA        | Atkinson     | 1.021549378 |
| 13071 | GEORGIA        | Colquitt     | 1.099195898 |
| 13093 | GEORGIA        | Dooly        | 1.142029036 |
| 13141 | GEORGIA        | Hancock      | 1.096106898 |
| 13309 | GEORGIA        | Wheeler      | 1.053777579 |
| 22039 | LOUISIANA      | Evangeline   | 1.098056519 |
| 28001 | MISSISSIPPI    | Adams        | 1.321685694 |
| 28011 | MISSISSIPPI    | Bolivar      | 1.079303057 |

**Appendix**  
**The Impact of Social Vulnerability on COVID-19 in the U.S.:**  
**An Analysis of Spatially Varying Relationships**  
**Karaye and Horney**

|       |                |              |             |
|-------|----------------|--------------|-------------|
| 28063 | MISSISSIPPI    | Jefferson    | 1.378346238 |
| 28079 | MISSISSIPPI    | Leake        | 1.511627858 |
| 28083 | MISSISSIPPI    | Leflore      | 1.235314956 |
| 45067 | SOUTH CAROLINA | Marion       | 1.010748292 |
| 01005 | ALABAMA        | Barbour      | 1.340872599 |
| 01063 | ALABAMA        | Greene       | 1.594109242 |
| 01105 | ALABAMA        | Perry        | 1.587561513 |
| 13193 | GEORGIA        | Macon        | 1.172263186 |
| 13239 | GEORGIA        | Quitman      | 1.283918046 |
| 13259 | GEORGIA        | Stewart      | 1.262749716 |
| 22035 | LOUISIANA      | East Carroll | 1.284711474 |
| 28051 | MISSISSIPPI    | Holmes       | 1.374053765 |
| 28053 | MISSISSIPPI    | Humphreys    | 1.317319648 |
| 28103 | MISSISSIPPI    | Noxubee      | 1.534855678 |
| 28133 | MISSISSIPPI    | Sunflower    | 1.181739865 |
| 28163 | MISSISSIPPI    | Yazoo        | 1.401240907 |
| 46017 | SOUTH DAKOTA   | Buffalo      | 1.212464634 |
| 53001 | WASHINGTON     | Adams        | 1.470037384 |
| 01085 | ALABAMA        | Lowndes      | 1.535488651 |
| 13037 | GEORGIA        | Calhoun      | 1.217047701 |
| 13265 | GEORGIA        | Taliaferro   | 1.075439007 |
| 22065 | LOUISIANA      | Madison      | 1.326148819 |
| 28123 | MISSISSIPPI    | Scott        | 1.548698194 |
| 28135 | MISSISSIPPI    | Tallahatchie | 1.117204286 |
| 28157 | MISSISSIPPI    | Wilkinson    | 1.312315005 |
| 46121 | SOUTH DAKOTA   | Todd         | 1.248376092 |
| 28021 | MISSISSIPPI    | Claiborne    | 1.396463381 |
| 45005 | SOUTH CAROLINA | Allendale    | 1.055127521 |

**Appendix**  
**The Impact of Social Vulnerability on COVID-19 in the U.S.:**  
**An Analysis of Spatially Varying Relationships**  
**Karaye and Horney**

**Appendix Table 3.** U.S. States and Counties at Increased Risk of COVID-19 Due to Household Composition and Disability Vulnerability ( $\beta \geq 1.00$ ;  $n=40$ )

| <b>FIPS</b> | <b>COUNTY</b> | <b>STATE</b> | <b>Coef (<math>\beta</math>)</b> |
|-------------|---------------|--------------|----------------------------------|
| 26007       | Alpena        | MICHIGAN     | 1.159665812                      |
| 26029       | Charlevoix    | MICHIGAN     | 1.183167303                      |
| 26041       | Delta         | MICHIGAN     | 1.262243757                      |
| 26043       | Dickinson     | MICHIGAN     | 1.243831823                      |
| 26047       | Emmet         | MICHIGAN     | 1.310535675                      |
| 26061       | Houghton      | MICHIGAN     | 1.461350274                      |
| 26103       | Marquette     | MICHIGAN     | 1.386158628                      |
| 26109       | Menominee     | MICHIGAN     | 1.100379812                      |
| 26137       | Otsego        | MICHIGAN     | 1.094435401                      |
| 30009       | Carbon        | MONTANA      | 1.237988403                      |
| 30111       | Yellowstone   | MONTANA      | 1.056205468                      |
| 55003       | Ashland       | WISCONSIN    | 1.132767638                      |
| 55041       | Forest        | WISCONSIN    | 1.100539105                      |
| 55075       | Marinette     | WISCONSIN    | 1.009727714                      |
| 56003       | Big Horn      | WYOMING      | 1.757147195                      |
| 56011       | Crook         | WYOMING      | 1.241708953                      |
| 56029       | Park          | WYOMING      | 1.29840092                       |
| 56033       | Sheridan      | WYOMING      | 1.790339604                      |
| 26009       | Antrim        | MICHIGAN     | 1.036312841                      |
| 26013       | Baraga        | MICHIGAN     | 1.41976337                       |
| 26031       | Cheboygan     | MICHIGAN     | 1.318828092                      |
| 26141       | Presque Isle  | MICHIGAN     | 1.316048921                      |
| 27075       | Lake          | MINNESOTA    | 1.267123751                      |
| 41003       | Benton        | OREGON       | 1.062039751                      |
| 41041       | Lincoln       | OREGON       | 1.093784444                      |
| 55007       | Bayfield      | WISCONSIN    | 1.086754271                      |
| 55037       | Florence      | WISCONSIN    | 1.172403532                      |
| 55051       | Iron          | WISCONSIN    | 1.184680301                      |
| 55085       | Oneida        | WISCONSIN    | 1.084049259                      |
| 55125       | Vilas         | WISCONSIN    | 1.194714823                      |
| 12087       | Monroe        | FLORIDA      | 1.170251058                      |
| 26033       | Chippewa      | MICHIGAN     | 1.684046314                      |
| 26095       | Luce          | MICHIGAN     | 1.597985975                      |
| 26153       | Schoolcraft   | MICHIGAN     | 1.426844887                      |
| 56039       | Teton         | WYOMING      | 1.043466129                      |
| 26053       | Gogebic       | MICHIGAN     | 1.283047048                      |
| 26097       | Mackinac      | MICHIGAN     | 1.524446856                      |
| 26119       | Montmorency   | MICHIGAN     | 1.132119626                      |
| 12021       | Collier       | FLORIDA      | 1.020032541                      |
| 30003       | Big Horn      | MONTANA      | 1.556351458                      |

**Appendix**  
**The Impact of Social Vulnerability on COVID-19 in the U.S.:**  
**An Analysis of Spatially Varying Relationships**  
**Karaye and Horney**

**Appendix Table 4.** U.S. States and Counties at Increased Risk of COVID-19 Due to Minority Status and Language Vulnerability ( $\beta \geq 3.00$ ; n=196)

| <b>FIPS</b> | <b>COUNTY</b> | <b>STATE</b>  | <b>Coef (<math>\beta</math>)</b> |
|-------------|---------------|---------------|----------------------------------|
| 09005       | Litchfield    | CONNECTICUT   | 3.029321                         |
| 09007       | Middlesex     | CONNECTICUT   | 3.006269                         |
| 09011       | New London    | CONNECTICUT   | 3.051864                         |
| 09015       | Windham       | CONNECTICUT   | 3.141963                         |
| 16001       | Ada           | IDAHO         | 3.282025                         |
| 16017       | Bonner        | IDAHO         | 3.531066                         |
| 16025       | Camas         | IDAHO         | 3.143297                         |
| 16039       | Elmore        | IDAHO         | 3.184827                         |
| 16045       | Gem           | IDAHO         | 3.345869                         |
| 16055       | Kootenai      | IDAHO         | 3.460972                         |
| 16069       | Nez Perce     | IDAHO         | 3.378322                         |
| 16085       | Valley        | IDAHO         | 3.187535                         |
| 23001       | Androscoggin  | MAINE         | 3.11899                          |
| 23005       | Cumberland    | MAINE         | 3.21832                          |
| 23017       | Oxford        | MAINE         | 3.145324                         |
| 23023       | Sagadahoc     | MAINE         | 3.099671                         |
| 23031       | York          | MAINE         | 3.303191                         |
| 25003       | Berkshire     | MASSACHUSETTS | 3.165648                         |
| 25011       | Franklin      | MASSACHUSETTS | 3.248792                         |
| 25023       | Plymouth      | MASSACHUSETTS | 3.257308                         |
| 27017       | Carlton       | MINNESOTA     | 3.077544                         |
| 27137       | St. Louis     | MINNESOTA     | 3.14448                          |
| 33001       | Belknap       | NEW HAMPSHIRE | 3.345416                         |
| 33005       | Cheshire      | NEW HAMPSHIRE | 3.316837                         |
| 33007       | Coos          | NEW HAMPSHIRE | 3.200286                         |
| 33009       | Grafton       | NEW HAMPSHIRE | 3.350323                         |
| 33013       | Merrimack     | NEW HAMPSHIRE | 3.352181                         |
| 33015       | Rockingham    | NEW HAMPSHIRE | 3.336507                         |
| 33017       | Strafford     | NEW HAMPSHIRE | 3.333576                         |
| 33019       | Sullivan      | NEW HAMPSHIRE | 3.358129                         |
| 36017       | Chenango      | NEW YORK      | 3.101884                         |
| 36021       | Columbia      | NEW YORK      | 3.112461                         |
| 36023       | Cortland      | NEW YORK      | 3.114757                         |
| 36025       | Delaware      | NEW YORK      | 3.051657                         |
| 36031       | Essex         | NEW YORK      | 3.389541                         |
| 36035       | Fulton        | NEW YORK      | 3.250478                         |
| 36037       | Genesee       | NEW YORK      | 3.039031                         |
| 36039       | Greene        | NEW YORK      | 3.093767                         |
| 36045       | Jefferson     | NEW YORK      | 3.317871                         |
| 36049       | Lewis         | NEW YORK      | 3.310929                         |
| 36053       | Madison       | NEW YORK      | 3.176846                         |
| 36069       | Ontario       | NEW YORK      | 3.115783                         |
| 36073       | Orleans       | NEW YORK      | 3.046911                         |

**Appendix**  
**The Impact of Social Vulnerability on COVID-19 in the U.S.:**  
**An Analysis of Spatially Varying Relationships**  
**Karaye and Horney**

|       |              |              |          |
|-------|--------------|--------------|----------|
| 36075 | Oswego       | NEW YORK     | 3.240922 |
| 36083 | Rensselaer   | NEW YORK     | 3.218273 |
| 36091 | Saratoga     | NEW YORK     | 3.273071 |
| 36095 | Schoharie    | NEW YORK     | 3.148252 |
| 36097 | Schuyler     | NEW YORK     | 3.070995 |
| 36101 | Steuben      | NEW YORK     | 3.039523 |
| 36107 | Tioga        | NEW YORK     | 3.041457 |
| 36111 | Ulster       | NEW YORK     | 3.000501 |
| 36113 | Warren       | NEW YORK     | 3.339754 |
| 36115 | Washington   | NEW YORK     | 3.323062 |
| 36117 | Wayne        | NEW YORK     | 3.16624  |
| 36121 | Wyoming      | NEW YORK     | 3.01341  |
| 41007 | Clatsop      | OREGON       | 3.873898 |
| 41009 | Columbia     | OREGON       | 3.945    |
| 41017 | Deschutes    | OREGON       | 3.699644 |
| 41043 | Linn         | OREGON       | 3.768846 |
| 41053 | Polk         | OREGON       | 3.757706 |
| 41061 | Union        | OREGON       | 3.652336 |
| 41065 | Wasco        | OREGON       | 3.982226 |
| 41071 | Yamhill      | OREGON       | 3.834996 |
| 44001 | Bristol      | RHODE ISLAND | 3.182138 |
| 44005 | Newport      | RHODE ISLAND | 3.153874 |
| 44009 | Washington   | RHODE ISLAND | 3.095869 |
| 50003 | Bennington   | VERMONT      | 3.297247 |
| 50005 | Caledonia    | VERMONT      | 3.332272 |
| 50011 | Franklin     | VERMONT      | 3.35479  |
| 50013 | Grand Isle   | VERMONT      | 3.38001  |
| 50015 | Lamoille     | VERMONT      | 3.359241 |
| 50017 | Orange       | VERMONT      | 3.374155 |
| 50019 | Orleans      | VERMONT      | 3.300822 |
| 50023 | Washington   | VERMONT      | 3.376195 |
| 50025 | Windham      | VERMONT      | 3.308445 |
| 50027 | Windsor      | VERMONT      | 3.369139 |
| 53003 | Asotin       | WASHINGTON   | 3.483728 |
| 53011 | Clark        | WASHINGTON   | 3.991207 |
| 53015 | Cowlitz      | WASHINGTON   | 4.004616 |
| 53027 | Grays Harbor | WASHINGTON   | 3.985013 |
| 53029 | Island       | WASHINGTON   | 4.435779 |
| 53035 | Kitsap       | WASHINGTON   | 4.247453 |
| 53037 | Kittitas     | WASHINGTON   | 4.169726 |
| 53041 | Lewis        | WASHINGTON   | 4.067256 |
| 53045 | Mason        | WASHINGTON   | 4.116006 |
| 53059 | Skamania     | WASHINGTON   | 4.041214 |
| 53065 | Stevens      | WASHINGTON   | 3.932658 |
| 53067 | Thurston     | WASHINGTON   | 4.077067 |
| 55003 | Ashland      | WISCONSIN    | 3.038102 |

**Appendix**  
**The Impact of Social Vulnerability on COVID-19 in the U.S.:**  
**An Analysis of Spatially Varying Relationships**  
**Karaye and Horney**

|       |              |               |          |
|-------|--------------|---------------|----------|
| 55031 | Douglas      | WISCONSIN     | 3.113383 |
| 09013 | Tolland      | CONNECTICUT   | 3.11665  |
| 16011 | Bingham      | IDAHO         | 3.108713 |
| 16013 | Blaine       | IDAHO         | 3.112858 |
| 16027 | Canyon       | IDAHO         | 3.368905 |
| 16051 | Jefferson    | IDAHO         | 3.005703 |
| 16083 | Twin Falls   | IDAHO         | 3.118612 |
| 16087 | Washington   | IDAHO         | 3.422401 |
| 23015 | Lincoln      | MAINE         | 3.003229 |
| 25001 | Barnstable   | MASSACHUSETTS | 3.257152 |
| 25005 | Bristol      | MASSACHUSETTS | 3.210286 |
| 25015 | Hampshire    | MASSACHUSETTS | 3.197163 |
| 25021 | Norfolk      | MASSACHUSETTS | 3.262989 |
| 25027 | Worcester    | MASSACHUSETTS | 3.251266 |
| 27075 | Lake         | MINNESOTA     | 3.170907 |
| 33003 | Carroll      | NEW HAMPSHIRE | 3.309705 |
| 33011 | Hillsborough | NEW HAMPSHIRE | 3.330225 |
| 36007 | Broome       | NEW YORK      | 3.039129 |
| 36011 | Cayuga       | NEW YORK      | 3.15508  |
| 36015 | Chemung      | NEW YORK      | 3.035862 |
| 36019 | Clinton      | NEW YORK      | 3.393339 |
| 36033 | Franklin     | NEW YORK      | 3.397954 |
| 36043 | Herkimer     | NEW YORK      | 3.280061 |
| 36051 | Livingston   | NEW YORK      | 3.066792 |
| 36055 | Monroe       | NEW YORK      | 3.113252 |
| 36057 | Montgomery   | NEW YORK      | 3.211026 |
| 36065 | Oneida       | NEW YORK      | 3.238168 |
| 36077 | Otsego       | NEW YORK      | 3.139629 |
| 36089 | St. Lawrence | NEW YORK      | 3.379309 |
| 36093 | Schenectady  | NEW YORK      | 3.211127 |
| 36099 | Seneca       | NEW YORK      | 3.127637 |
| 36123 | Yates        | NEW YORK      | 3.096899 |
| 41001 | Baker        | OREGON        | 3.590405 |
| 41003 | Benton       | OREGON        | 3.630201 |
| 41005 | Clackamas    | OREGON        | 3.947151 |
| 41013 | Crook        | OREGON        | 3.817072 |
| 41025 | Harney       | OREGON        | 3.409169 |
| 41027 | Hood River   | OREGON        | 4.005742 |
| 41031 | Jefferson    | OREGON        | 3.913639 |
| 41039 | Lane         | OREGON        | 3.470382 |
| 41041 | Lincoln      | OREGON        | 3.605629 |
| 41057 | Tillamook    | OREGON        | 3.808059 |
| 41063 | Wallowa      | OREGON        | 3.483046 |
| 41067 | Washington   | OREGON        | 3.902139 |
| 44003 | Kent         | RHODE ISLAND  | 3.14403  |
| 50001 | Addison      | VERMONT       | 3.388524 |

**Appendix**  
**The Impact of Social Vulnerability on COVID-19 in the U.S.:**  
**An Analysis of Spatially Varying Relationships**  
**Karaye and Horney**

|       |              |               |          |
|-------|--------------|---------------|----------|
| 50007 | Chittenden   | VERMONT       | 3.385995 |
| 50009 | Essex        | VERMONT       | 3.256553 |
| 50021 | Rutland      | VERMONT       | 3.363778 |
| 53005 | Benton       | WASHINGTON    | 3.924677 |
| 53007 | Chelan       | WASHINGTON    | 4.350801 |
| 53009 | Clallam      | WASHINGTON    | 4.186464 |
| 53031 | Jefferson    | WASHINGTON    | 4.154298 |
| 53039 | Klickitat    | WASHINGTON    | 4.024798 |
| 53043 | Lincoln      | WASHINGTON    | 3.907448 |
| 53053 | Pierce       | WASHINGTON    | 4.154722 |
| 53055 | San Juan     | WASHINGTON    | 4.54052  |
| 53061 | Snohomish    | WASHINGTON    | 4.446423 |
| 53063 | Spokane      | WASHINGTON    | 3.654178 |
| 53071 | Walla Walla  | WASHINGTON    | 3.75328  |
| 53073 | Whatcom      | WASHINGTON    | 4.722452 |
| 55007 | Bayfield     | WISCONSIN     | 3.112863 |
| 55113 | Sawyer       | WISCONSIN     | 3.027037 |
| 55129 | Washburn     | WISCONSIN     | 3.032876 |
| 16037 | Custer       | IDAHO         | 3.062925 |
| 16049 | Idaho        | IDAHO         | 3.087148 |
| 16057 | Latah        | IDAHO         | 3.382247 |
| 16067 | Minidoka     | IDAHO         | 3.157513 |
| 16075 | Payette      | IDAHO         | 3.406743 |
| 25017 | Middlesex    | MASSACHUSETTS | 3.296613 |
| 30053 | Lincoln      | MONTANA       | 3.193169 |
| 36001 | Albany       | NEW YORK      | 3.170999 |
| 36041 | Hamilton     | NEW YORK      | 3.329861 |
| 36067 | Onondaga     | NEW YORK      | 3.179339 |
| 41023 | Grant        | OREGON        | 3.783268 |
| 41047 | Marion       | OREGON        | 3.868354 |
| 41055 | Sherman      | OREGON        | 3.987175 |
| 41059 | Umatilla     | OREGON        | 3.781555 |
| 53013 | Columbia     | WASHINGTON    | 3.642326 |
| 53017 | Douglas      | WASHINGTON    | 4.199866 |
| 53019 | Ferry        | WASHINGTON    | 4.133581 |
| 53047 | Okanogan     | WASHINGTON    | 4.437281 |
| 53049 | Pacific      | WASHINGTON    | 3.91348  |
| 53051 | Pend Oreille | WASHINGTON    | 3.786378 |
| 53057 | Skagit       | WASHINGTON    | 4.596316 |
| 53069 | Wahkiakum    | WASHINGTON    | 3.928596 |
| 09003 | Hartford     | CONNECTICUT   | 3.071101 |
| 16003 | Adams        | IDAHO         | 3.350988 |
| 16047 | Gooding      | IDAHO         | 3.13071  |
| 16063 | Lincoln      | IDAHO         | 3.13669  |
| 25009 | Essex        | MASSACHUSETTS | 3.322926 |
| 36109 | Tompkins     | NEW YORK      | 3.086281 |



**Appendix**  
**The Impact of Social Vulnerability on COVID-19 in the U.S.:**  
**An Analysis of Spatially Varying Relationships**  
**Karaye and Horney**

|       |            |               |          |
|-------|------------|---------------|----------|
| 41051 | Multnomah  | OREGON        | 3.969712 |
| 44007 | Providence | RHODE ISLAND  | 3.187234 |
| 53033 | King       | WASHINGTON    | 4.275399 |
| 53075 | Whitman    | WASHINGTON    | 3.595058 |
| 16053 | Jerome     | IDAHO         | 3.145065 |
| 16073 | Owyhee     | IDAHO         | 3.116984 |
| 25013 | Hampden    | MASSACHUSETTS | 3.15562  |
| 25025 | Suffolk    | MASSACHUSETTS | 3.292088 |
| 41045 | Malheur    | OREGON        | 3.401548 |
| 53025 | Grant      | WASHINGTON    | 4.043056 |
| 41049 | Morrow     | OREGON        | 3.900651 |
| 53021 | Franklin   | WASHINGTON    | 3.852122 |
| 53077 | Yakima     | WASHINGTON    | 4.068532 |
| 53001 | Adams      | WASHINGTON    | 3.840345 |
| 48427 | Starr      | TEXAS         | 3.010449 |

**Appendix**  
**The Impact of Social Vulnerability on COVID-19 in the U.S.:**  
**An Analysis of Spatially Varying Relationships**  
**Karaye and Horney**

**Appendix Table 5.** U.S. States and Counties at Increased Risk of COVID-19 Due to Housing and Transportation Vulnerability ( $\beta \geq 1.00$ ;  $n=46$ )

| <b>FIPS</b> | <b>COUNTY</b> | <b>STATE</b> | <b>Coef (<math>\beta</math>)</b> |
|-------------|---------------|--------------|----------------------------------|
| 27061       | Itasca        | MINNESOTA    | 1.080398                         |
| 27071       | Koochiching   | MINNESOTA    | 1.1356                           |
| 27137       | St. Louis     | MINNESOTA    | 1.313956                         |
| 30009       | Carbon        | MONTANA      | 1.267295                         |
| 30031       | Gallatin      | MONTANA      | 1.06413                          |
| 30067       | Park          | MONTANA      | 1.191736                         |
| 30095       | Stillwater    | MONTANA      | 1.224458                         |
| 30107       | Wheatland     | MONTANA      | 1.07198                          |
| 30111       | Yellowstone   | MONTANA      | 1.112                            |
| 56003       | Big Horn      | WYOMING      | 1.157578                         |
| 56029       | Park          | WYOMING      | 1.359107                         |
| 04025       | Yavapai       | ARIZONA      | 1.526156                         |
| 12015       | Charlotte     | FLORIDA      | 1.057988                         |
| 12111       | St. Lucie     | FLORIDA      | 1.014196                         |
| 16043       | Fremont       | IDAHO        | 1.106169                         |
| 16081       | Teton         | IDAHO        | 1.169361                         |
| 27075       | Lake          | MINNESOTA    | 1.34628                          |
| 30037       | Golden Valley | MONTANA      | 1.101699                         |
| 30065       | Musselshell   | MONTANA      | 1.042514                         |
| 41015       | Curry         | OREGON       | 1.04561                          |
| 04005       | Coconino      | ARIZONA      | 1.279021                         |
| 04011       | Greenlee      | ARIZONA      | 1.196607                         |
| 06015       | Del Norte     | CALIFORNIA   | 1.010874                         |
| 12085       | Martin        | FLORIDA      | 1.090894                         |
| 12087       | Monroe        | FLORIDA      | 1.280673                         |
| 12099       | Palm Beach    | FLORIDA      | 1.177076                         |
| 35017       | Grant         | NEW MEXICO   | 1.055511                         |
| 41033       | Josephine     | OREGON       | 1.000267                         |
| 56039       | Teton         | WYOMING      | 1.302284                         |
| 04007       | Gila          | ARIZONA      | 1.342171                         |
| 04013       | Maricopa      | ARIZONA      | 1.208245                         |
| 04015       | Mohave        | ARIZONA      | 1.131935                         |
| 12011       | Broward       | FLORIDA      | 1.247396                         |
| 12071       | Lee           | FLORIDA      | 1.133398                         |
| 35003       | Catron        | NEW MEXICO   | 1.317554                         |
| 12021       | Collier       | FLORIDA      | 1.226347                         |
| 04009       | Graham        | ARIZONA      | 1.053259                         |
| 04012       | La Paz        | ARIZONA      | 1.307967                         |
| 16065       | Madison       | IDAHO        | 1.041881                         |
| 04017       | Navajo        | ARIZONA      | 1.48547                          |
| 12043       | Glades        | FLORIDA      | 1.085631                         |
| 30003       | Big Horn      | MONTANA      | 1.029497                         |
| 04001       | Apache        | ARIZONA      | 1.465417                         |

**Appendix**  
**The Impact of Social Vulnerability on COVID-19 in the U.S.:**  
**An Analysis of Spatially Varying Relationships**  
**Karaye and Horney**

|       |          |            |          |
|-------|----------|------------|----------|
| 35006 | Cibola   | NEW MEXICO | 1.273055 |
| 12051 | Hendry   | FLORIDA    | 1.165823 |
| 35031 | McKinley | NEW MEXICO | 1.233853 |
